# Supplementary material
Source: publisher site journal article supplement (https://www.spandidos-publications.com/2173/downloadSupplementary)

Figure S1. GO classification of cis-acting targets. GO, Gene Ontology.

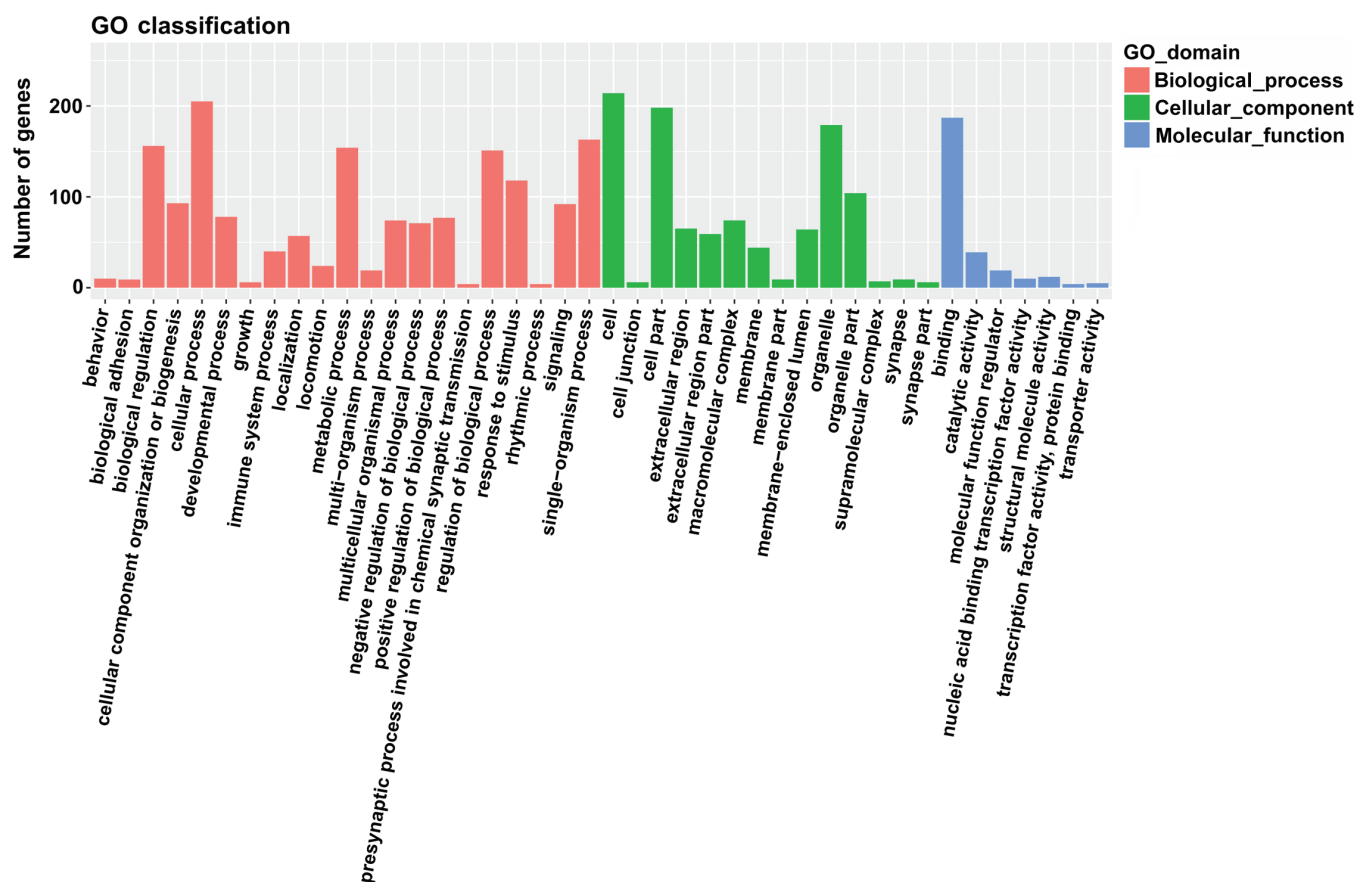

Figure S2. GO classification of trans-acting targets. GO, Gene Ontology.

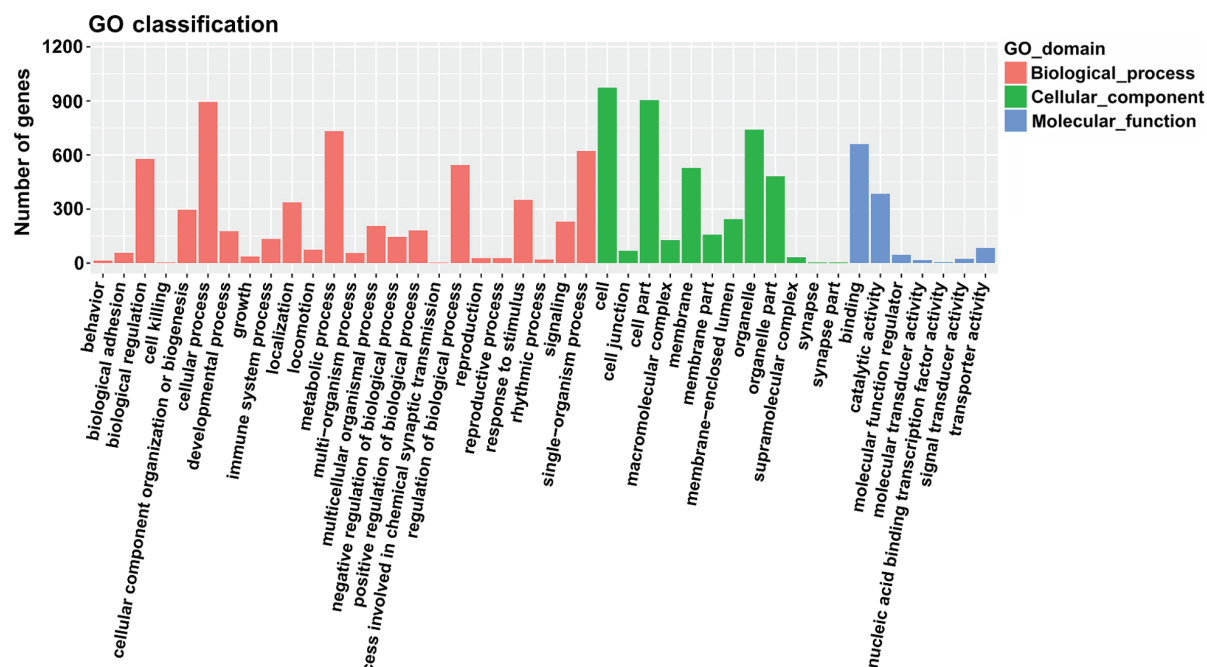

Figure S3. Top 30 Kyoto Encyclopedia of Genes and Genomes pathway enrichment of cis-targets.

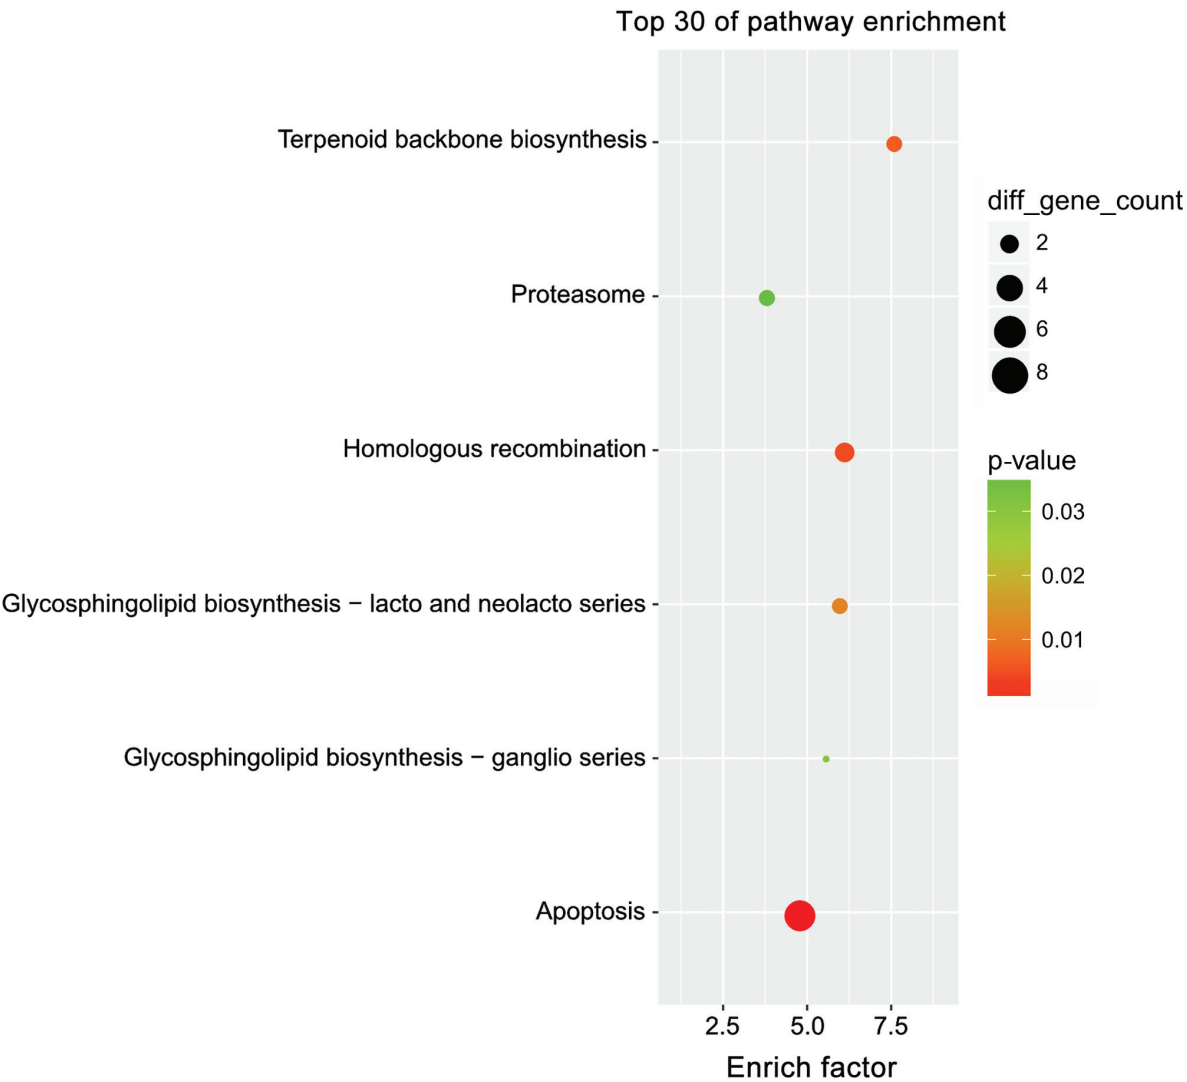

Figure S4. Top 30 Kyoto Encyclopedia of Genes and Genomes pathway enrichment of trans-targets.

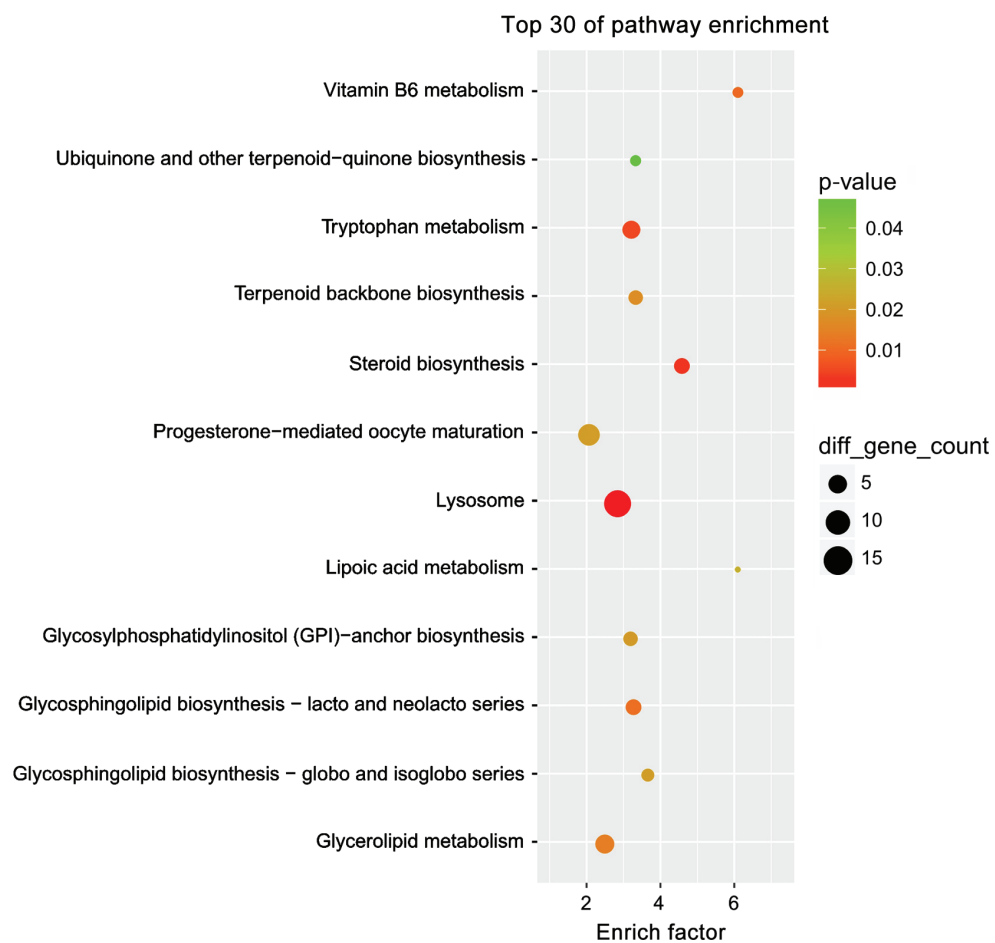

Supplement: Supplementary file 1 [file downloadSupplementary]
